# Supplementary material for: Novel homogeneous photocatalyst for oxygen to hydrogen peroxide reduction in aqueous media
Source: Royal Society of Chemistry journal article supplement (doi:10.1039/c9pp00206e), 2019-06-17
Supplement: c9pp00206e1.pdf [file c9pp00206e1.pdf]

Electronic supporting information for

**Novel homogeneous photocatalyst for oxygen to hydrogen peroxide reduction in aqueous media**

Daniil A. Lukyanov, Liya D. Funt, Alexander S. Konev,\* Alexey V. Povolotskiy, Anatoly A. Vereshchagin, Oleg V. Levin and Alexander F. Khlebnikov

**Figure SI1.** UV-Vis absorption spectra of titanyl oxalate – H<sub>2</sub>O<sub>2</sub> complex.

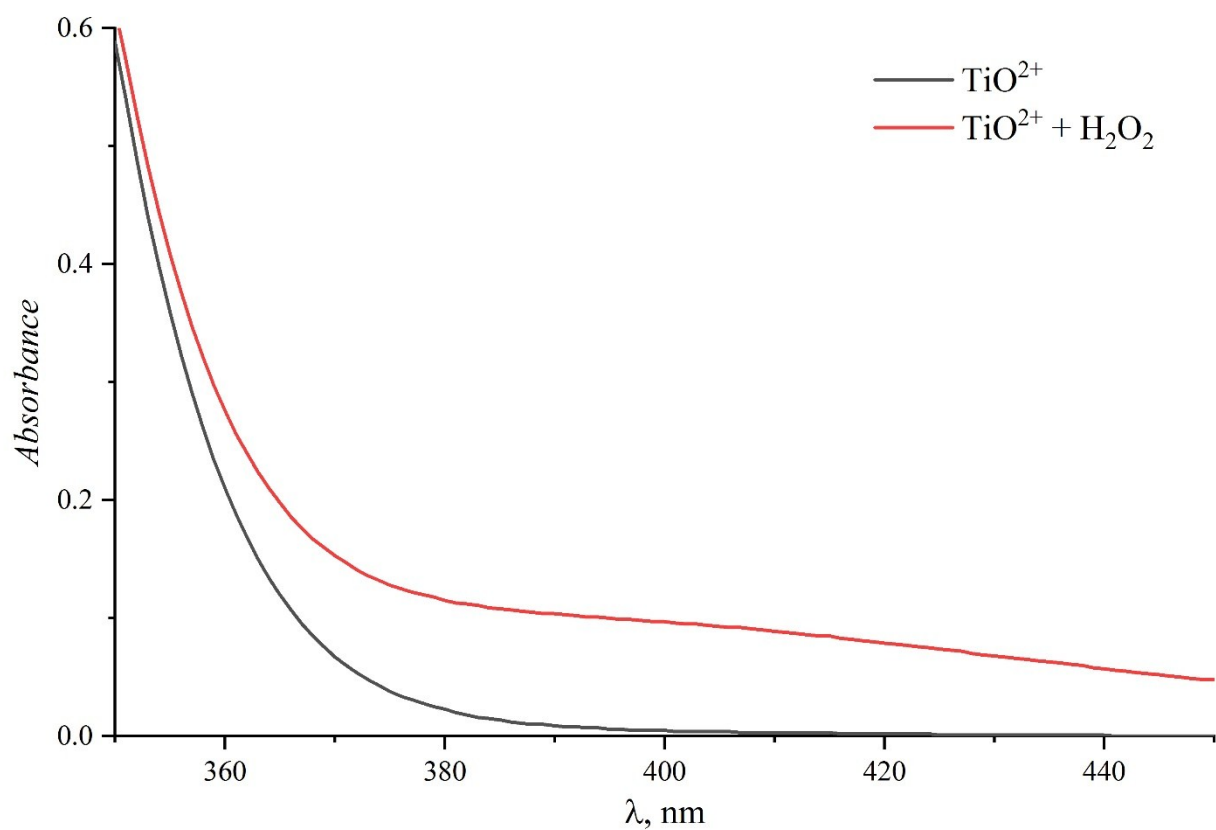

**Figure SI2.** Calibration curve for titanyl oxalate photometric analysis (absorbance at 400 nm).

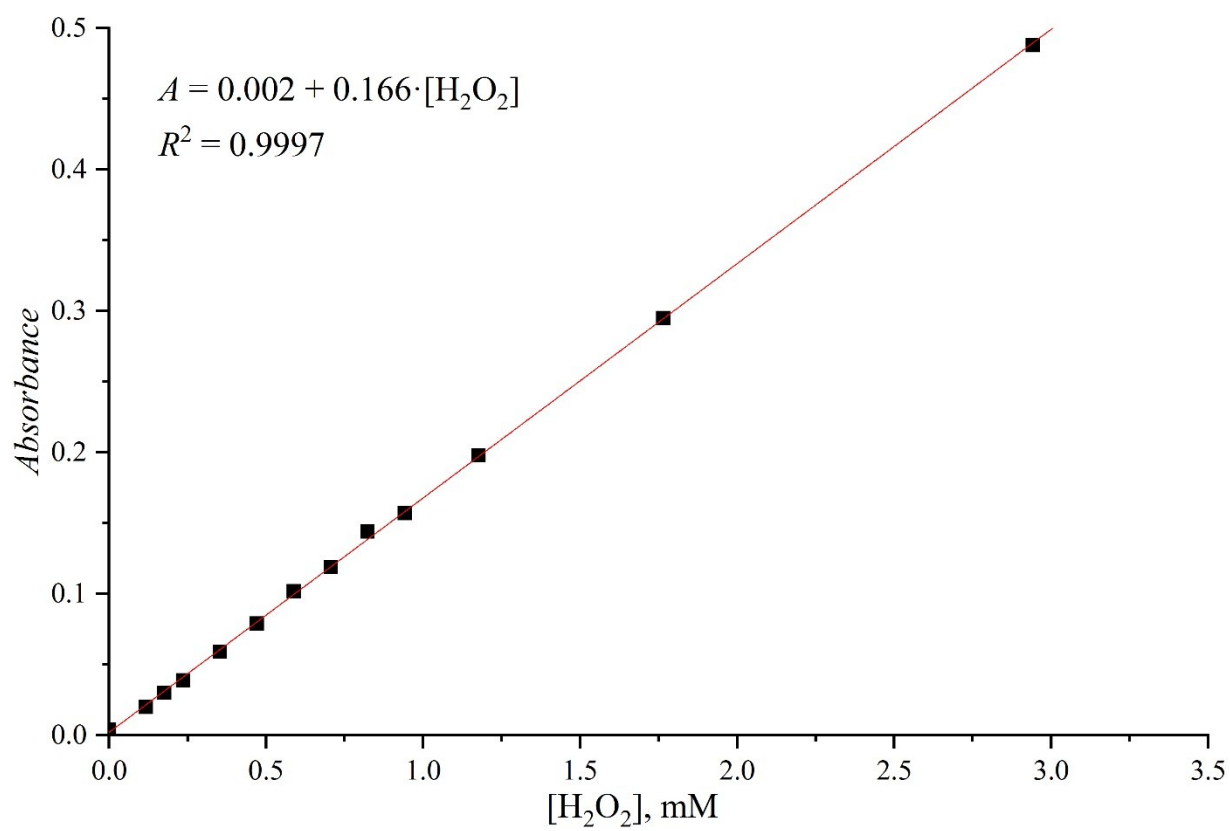

**Figure SI3.** UV-Vis absorption spectra of **I** (solid line), **IIa** (dashed line) and MeIsoQ (*N*-methylisoquinolinium tetrafluoroborate, dotted line) in water (*c* 0.1 mM).

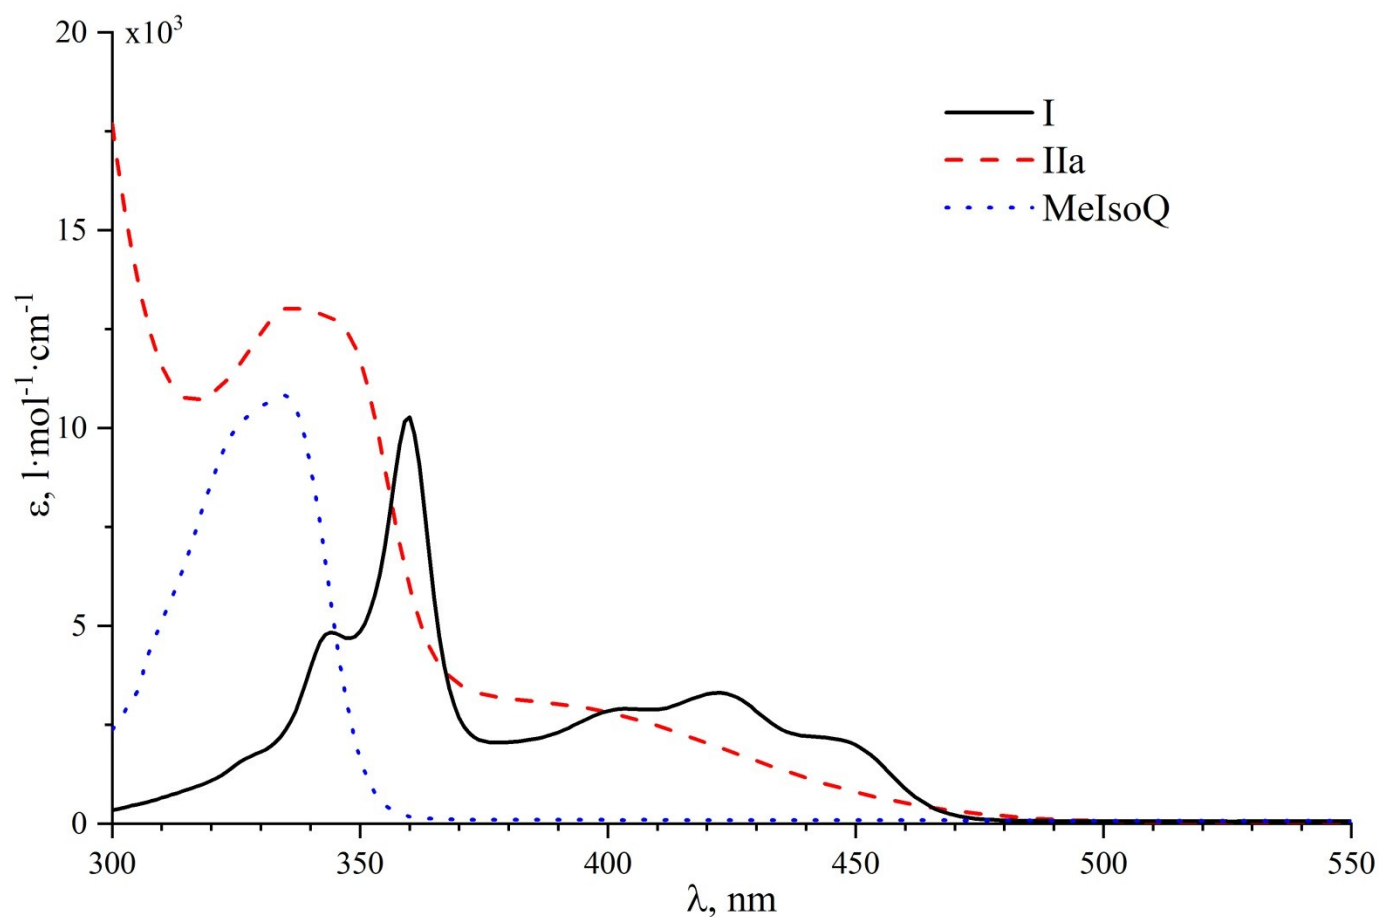

**Figure SI4.** UV-Vis absorption spectra of **IIa-d** in water (*c* 0.1 mM).

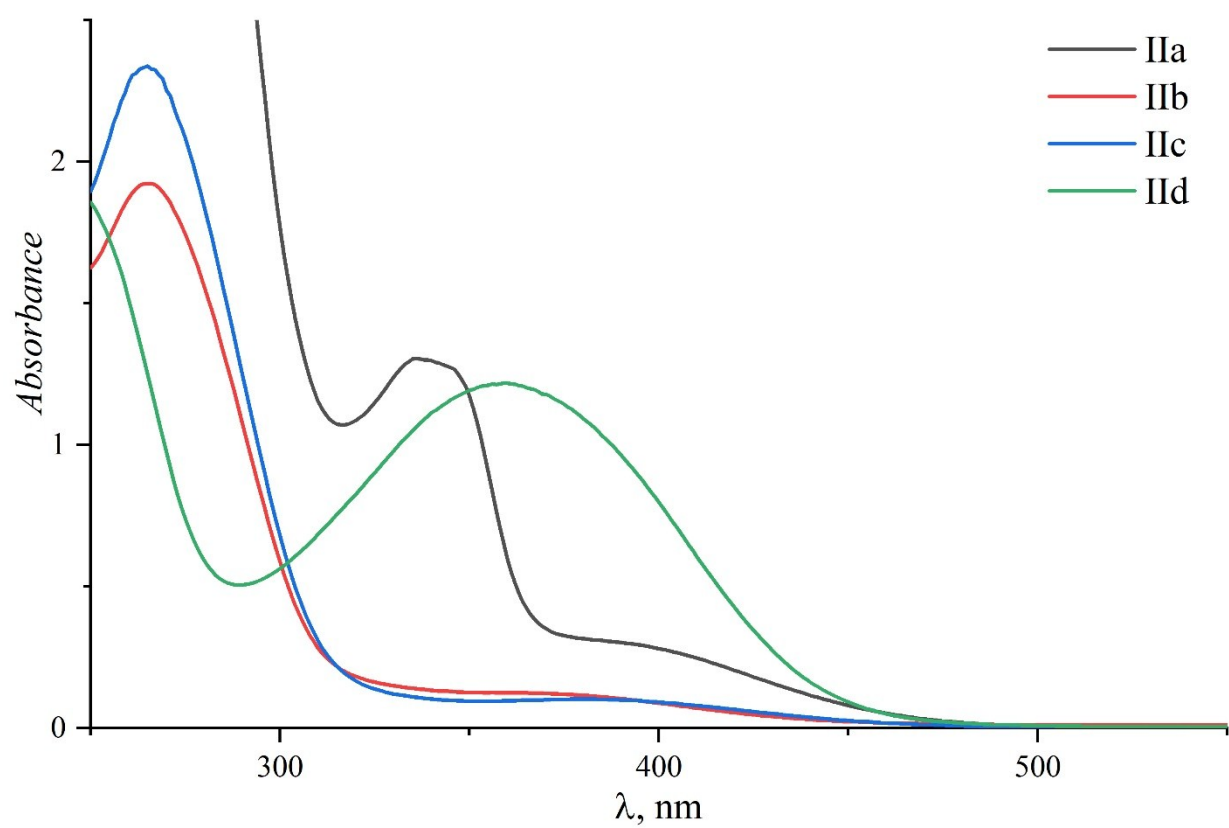

**Figure S15.** UV-Vis absorption spectra of **IIIa-d** in water ( $c$  0.1 mM).

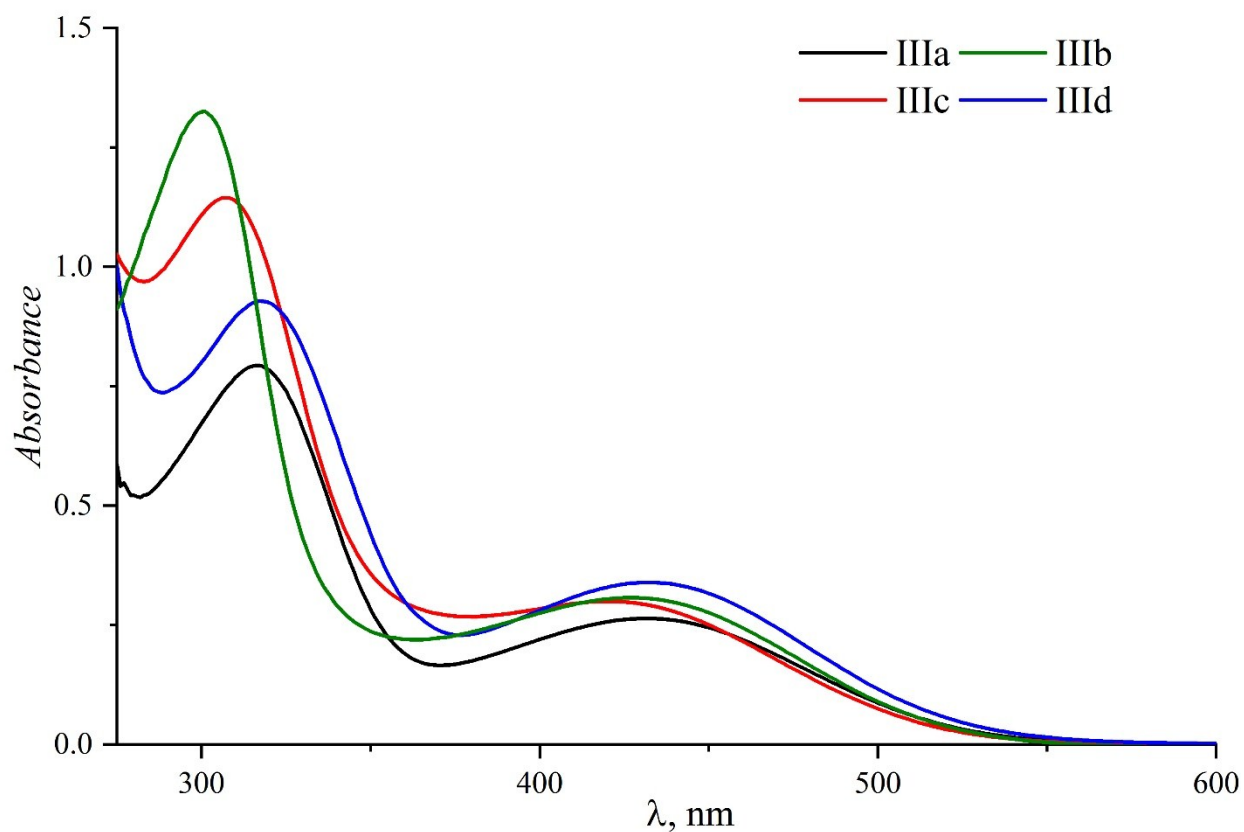

**Figure S16.** UV-Vis absorption spectra of **IIa** ( $c$  0.1 mM) with titanyl oxalate additive (1 equiv.) in water.

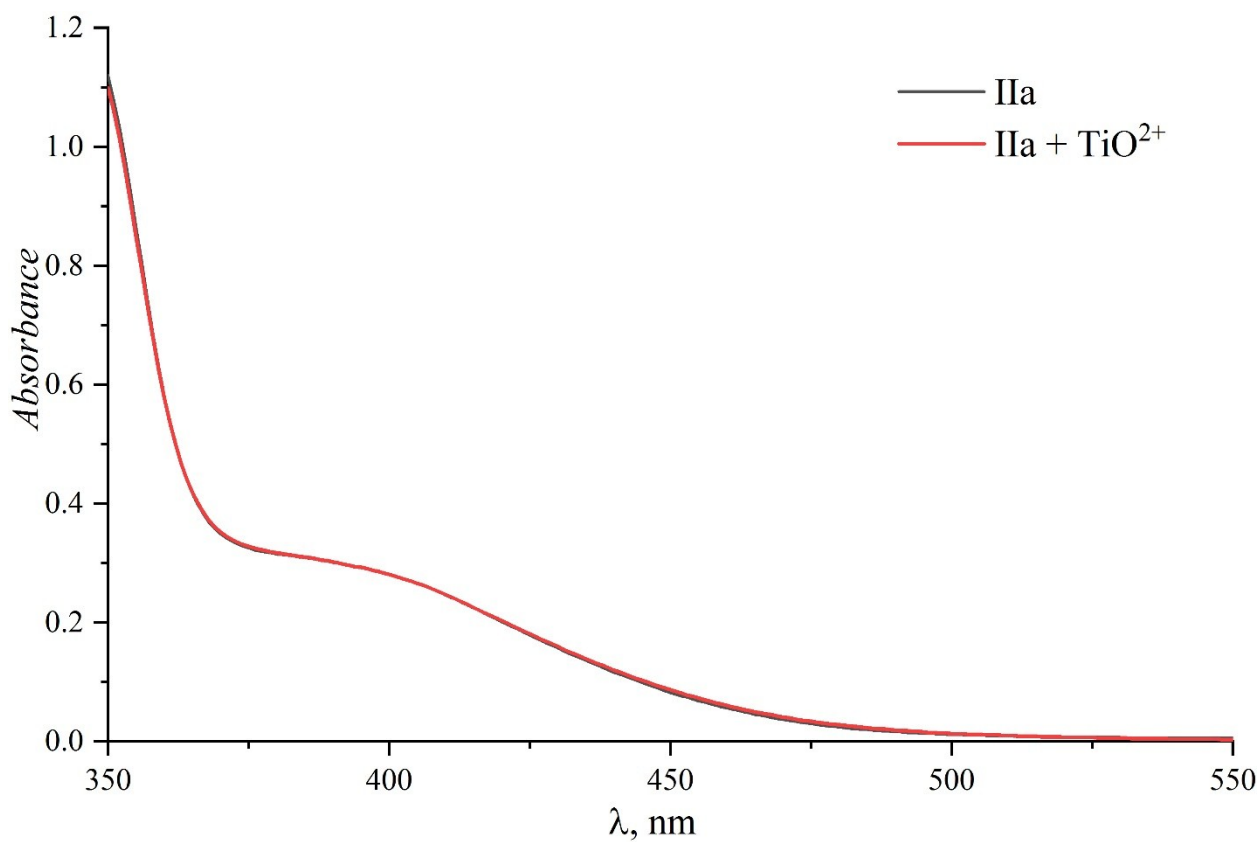

**Figure SI7.** UV-Vis absorption spectra of **IIIa** (*c* 0.1 mM) with titanyl oxalate additive (1 equiv.) in water.

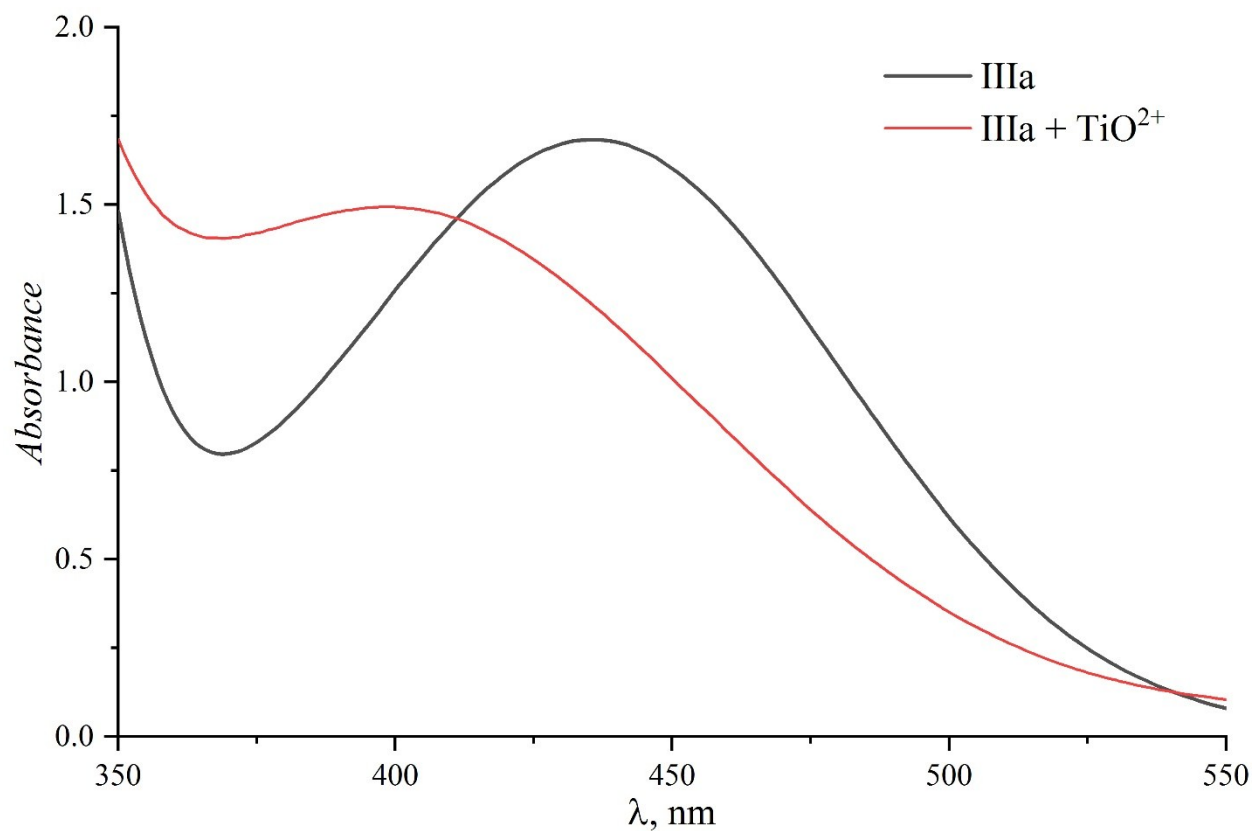

**Figure SI8.** Increase of the absorbance of the titanyl oxalate H<sub>2</sub>O<sub>2</sub> complex upon photocatalytic reduction of O<sub>2</sub> with oxalate photocatalyzed by compound **I**.

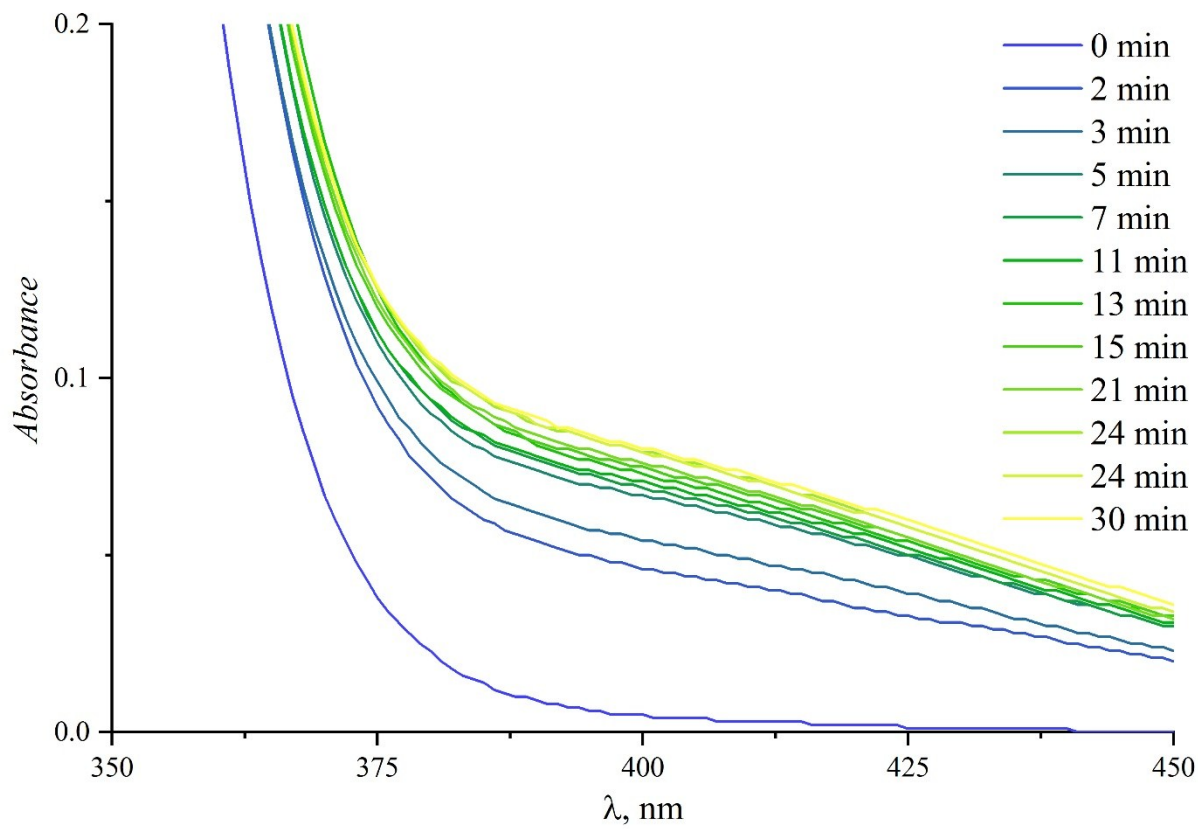

**Figure SI9.** Increase of the absorbance of the titanyl oxalate  $\text{H}_2\text{O}_2$  complex upon photocatalytic reduction of  $\text{O}_2$  with oxalate photocatalyzed by compound **IIa**.

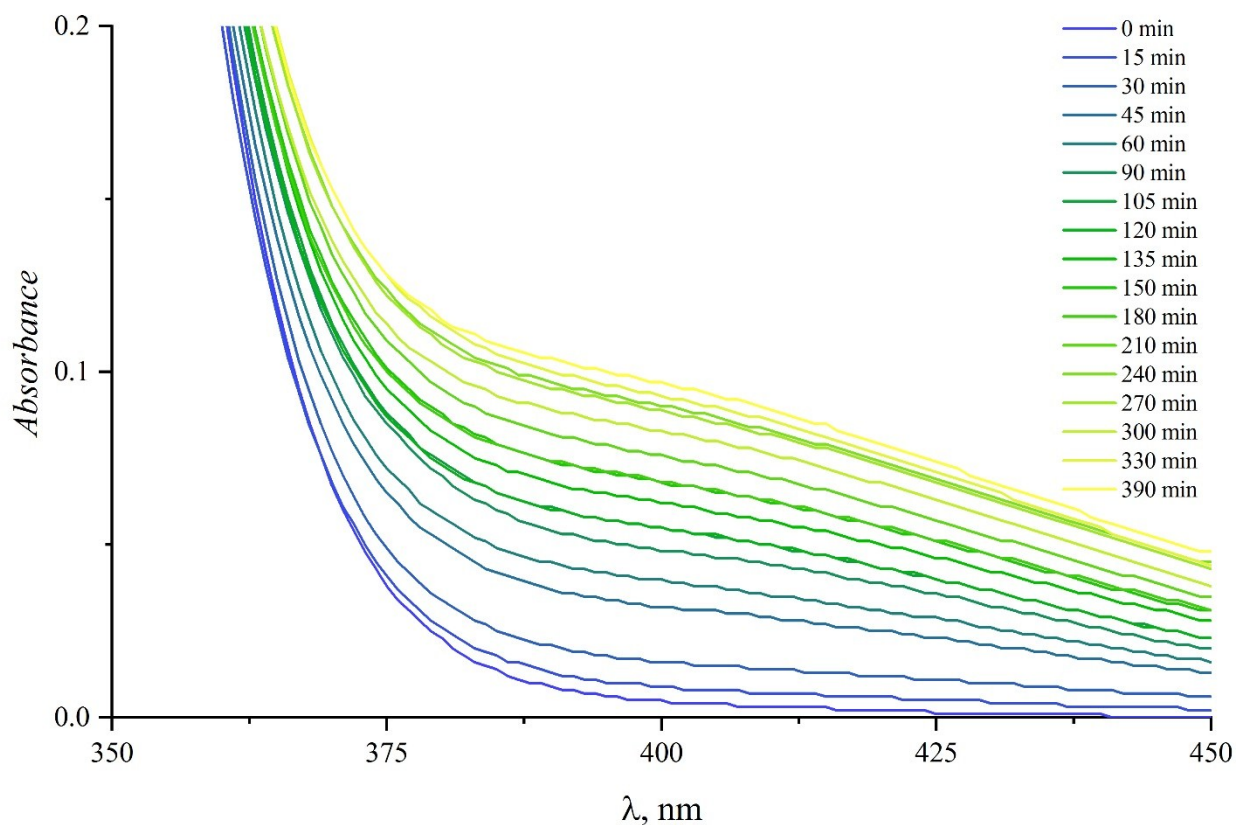

**Figure SI10.** Control experiments for  $\text{H}_2\text{O}_2$  generation: without the catalyst (blue line), without irradiation (green line) and irradiation under argon (red line) compared to  $\text{H}_2\text{O}_2$  generation upon irradiation of the reaction mixture purged with  $\text{O}_2$  with 420 nm LED in the presence of **IIa** (black line).

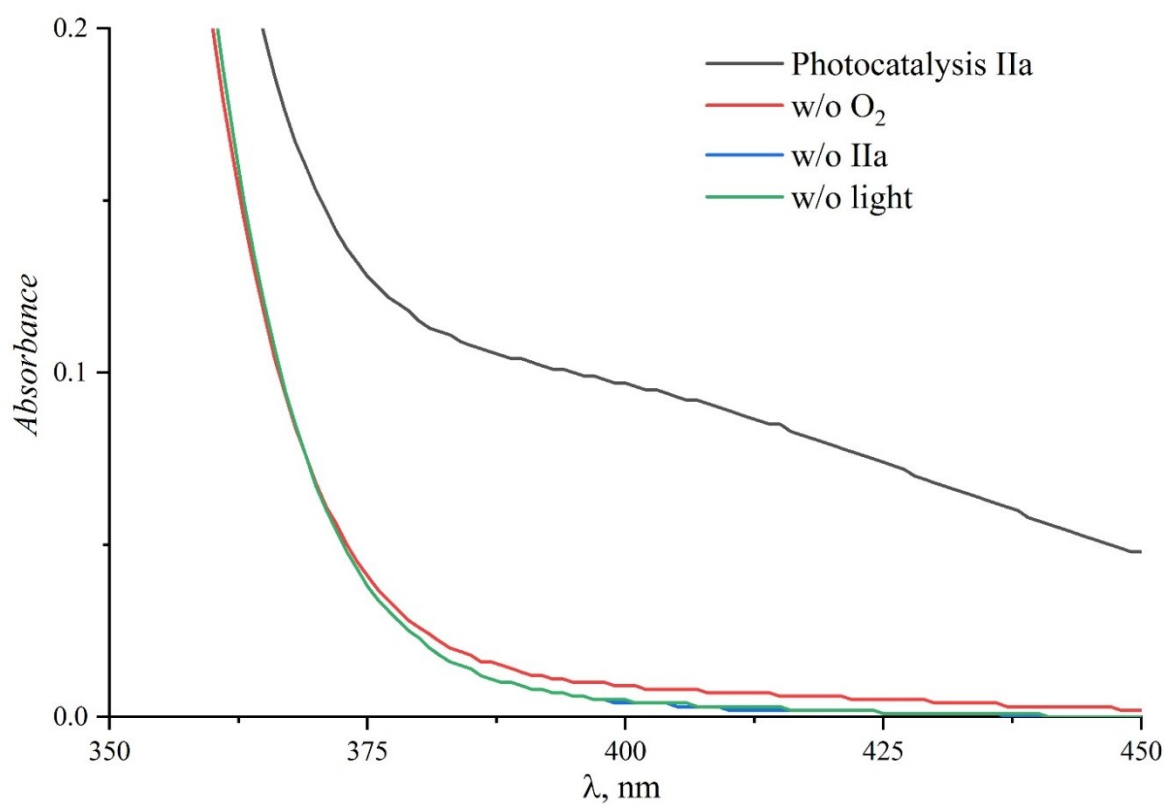

**Figure SI11.** Cyclic voltammogram of TEMPOL (*c* 1.0 mM in 0.1 M DMF solution of LiClO<sub>4</sub>).

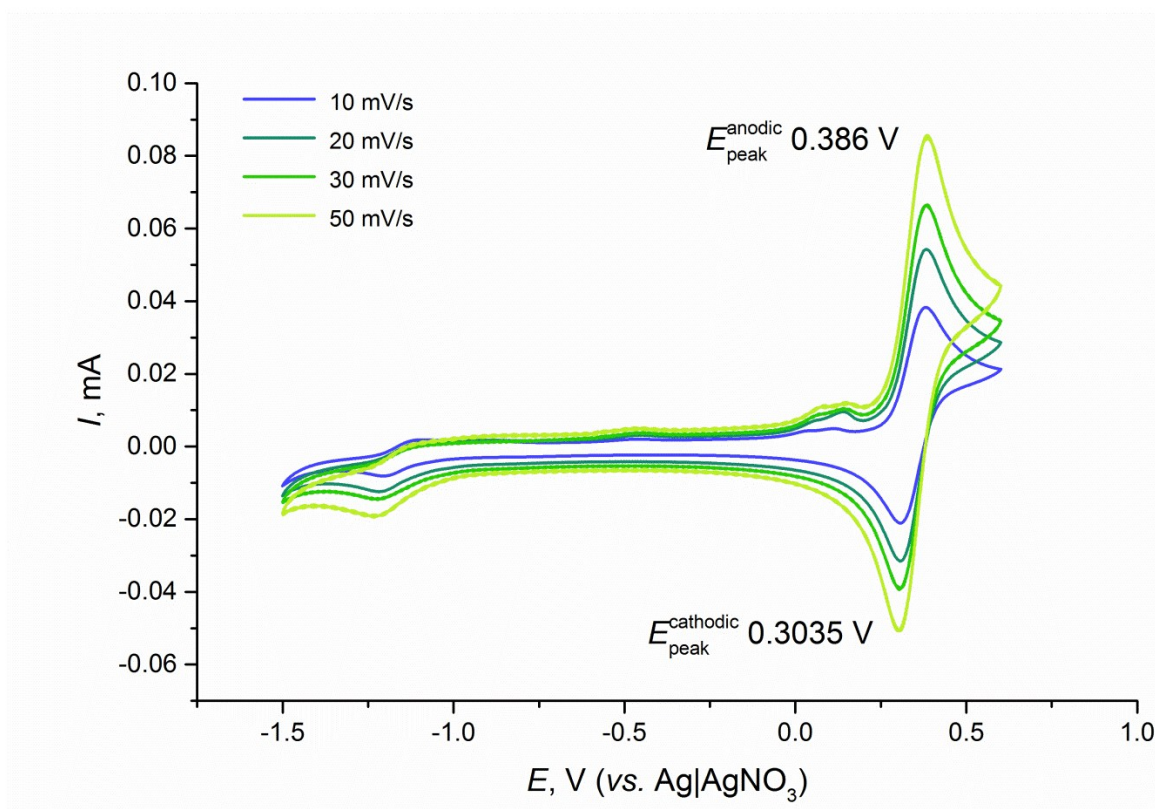

**Figure SI12.** Cyclic voltammogram of **IIa** (*c* 1.0 mM in 0.1 M DMF solution of LiClO<sub>4</sub>) in -1.5 – 0 V potential range.

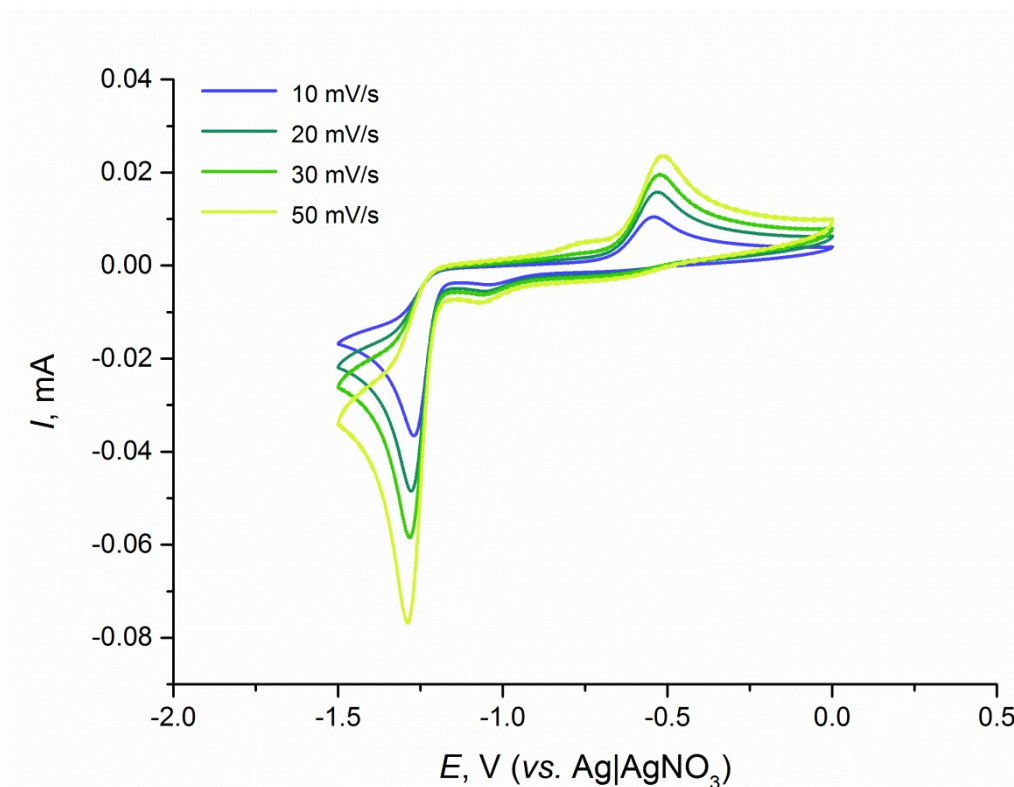



**Figure SI13.** Cyclic voltammogram of **IIa** (*c* 1.0 mM in 0.1 M DMF solution of LiClO<sub>4</sub>) in -1.0 – +0.6 V potential range.

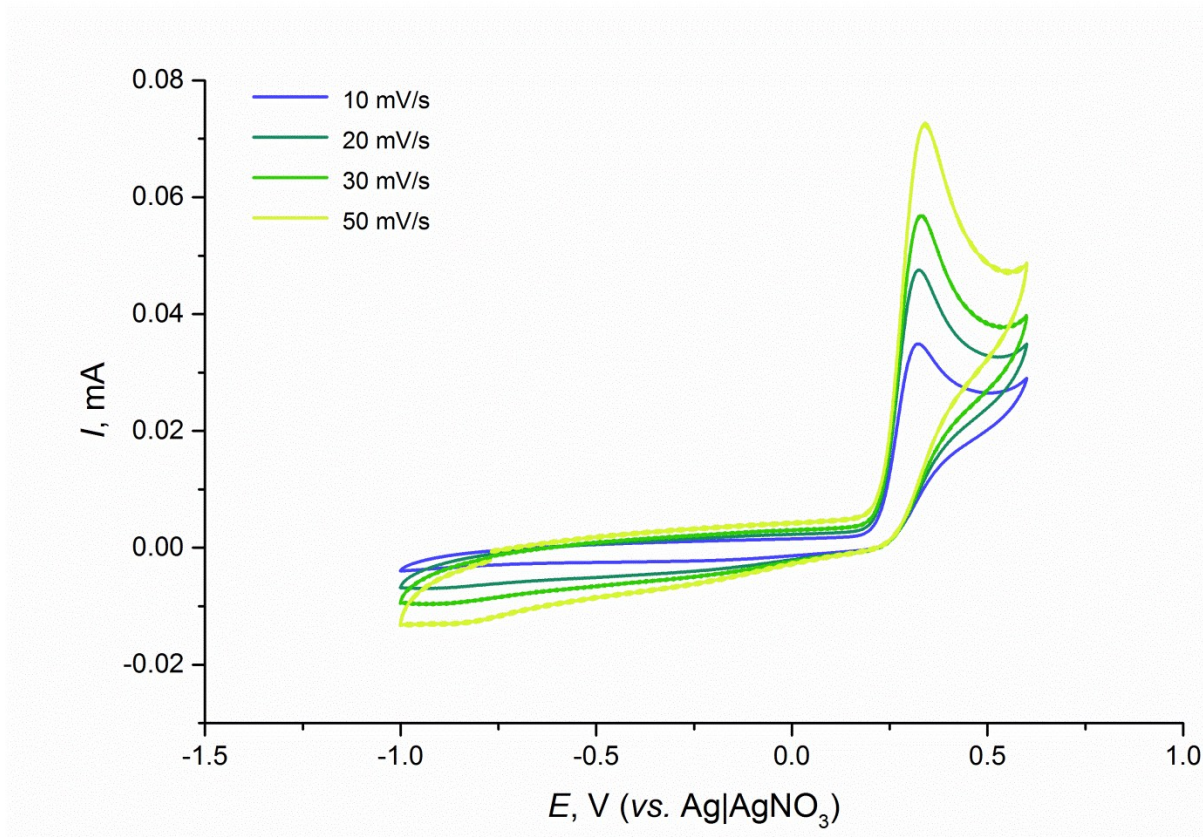

**Figure SI14.** Emission spectrum in the near IR range (no emission of the singlet oxygen).

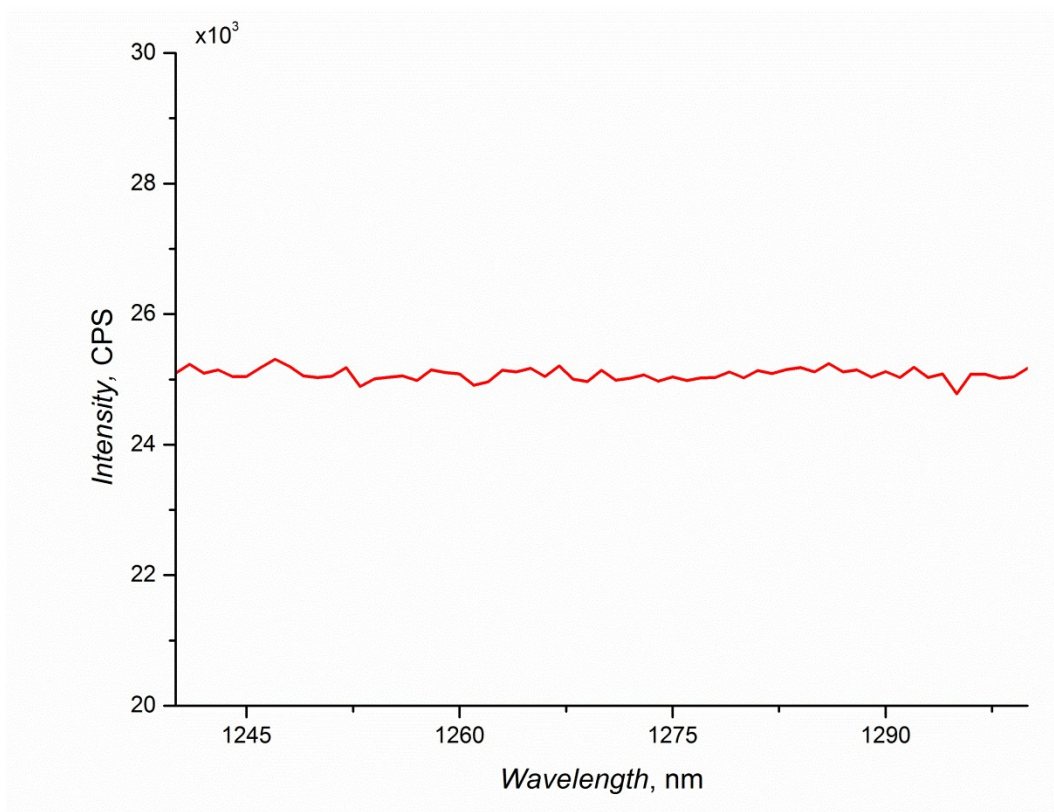



**Figure SI15a.** Emission spectra of compound **IIa** (water,  $c$  0.1 mM) in the presence of oxalate ions.

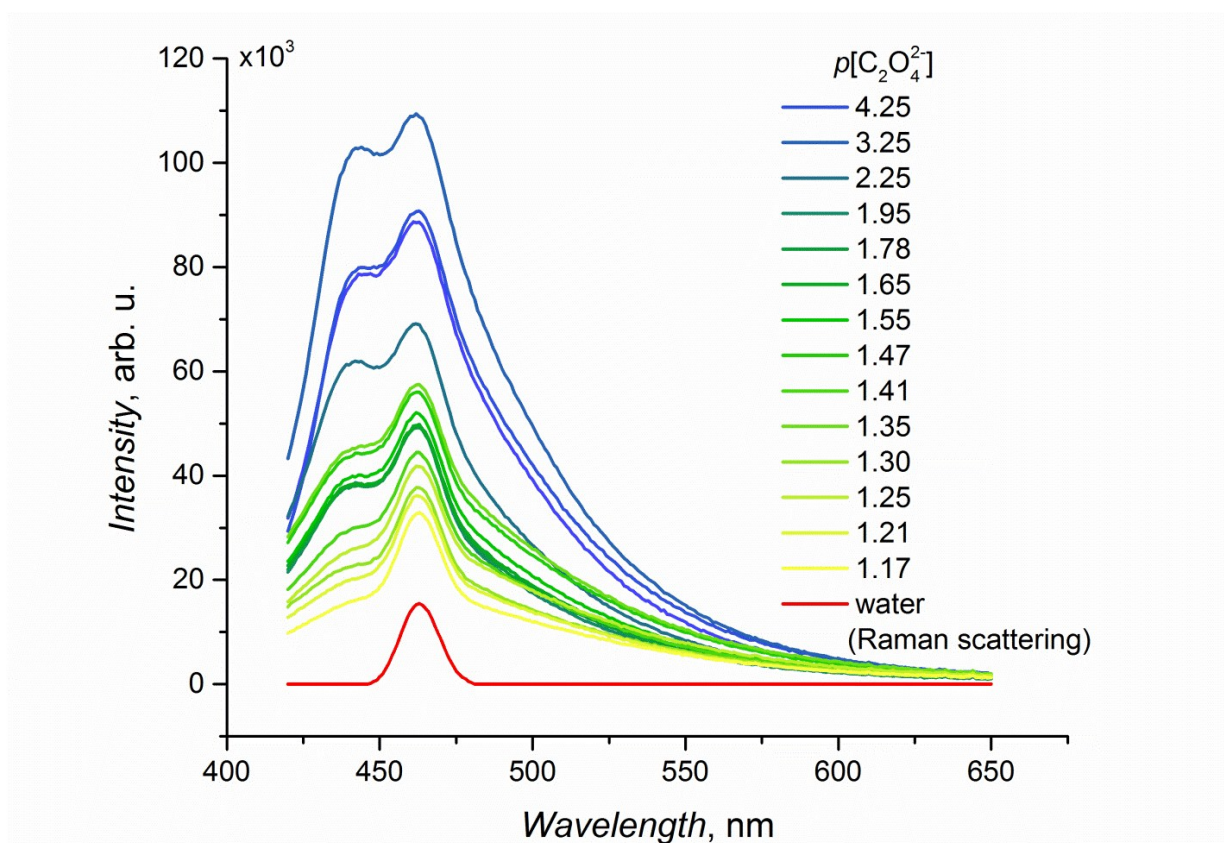

**Figure SI16.** Stern-Volmer plot for fluorescence intensity of compound **IIa** (water,  $c$  0.1 mM) at variable concentrations of oxalate ions.

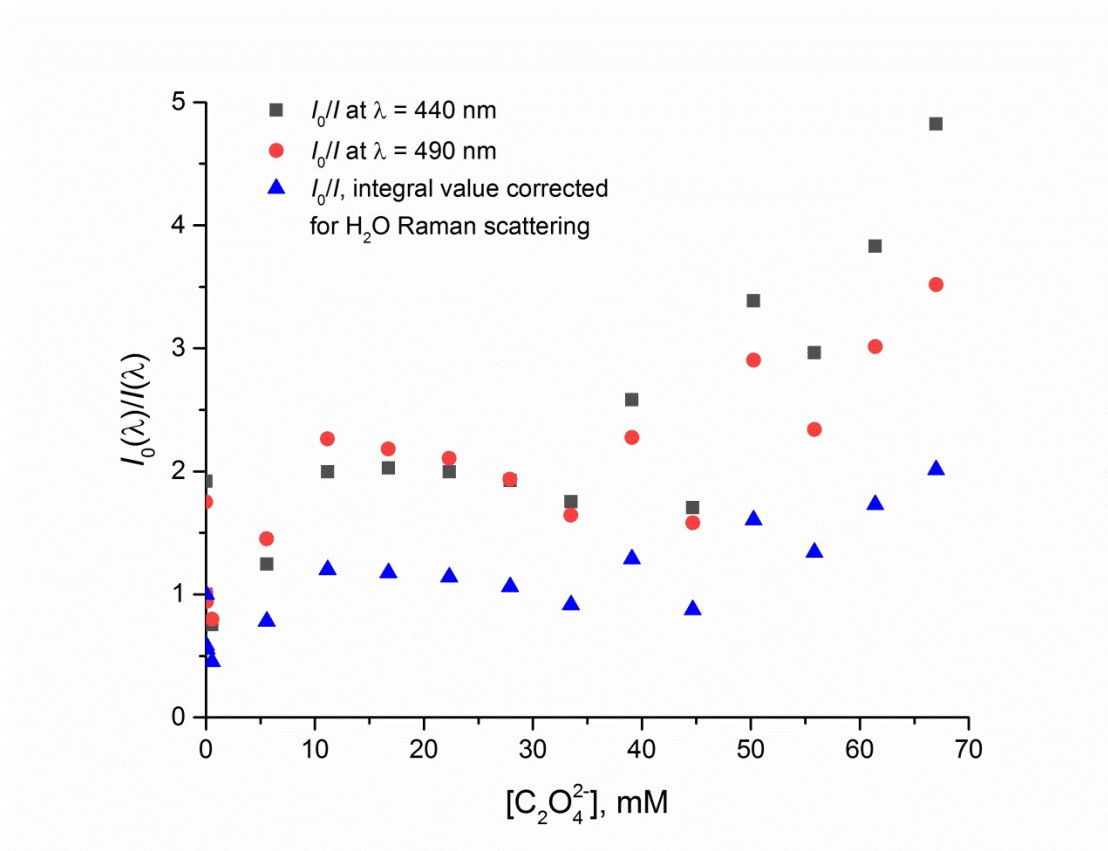

**Figure SI17.** Dependence of fluorescence kinetics of compound **IIa** on the concentration of oxalate ions.

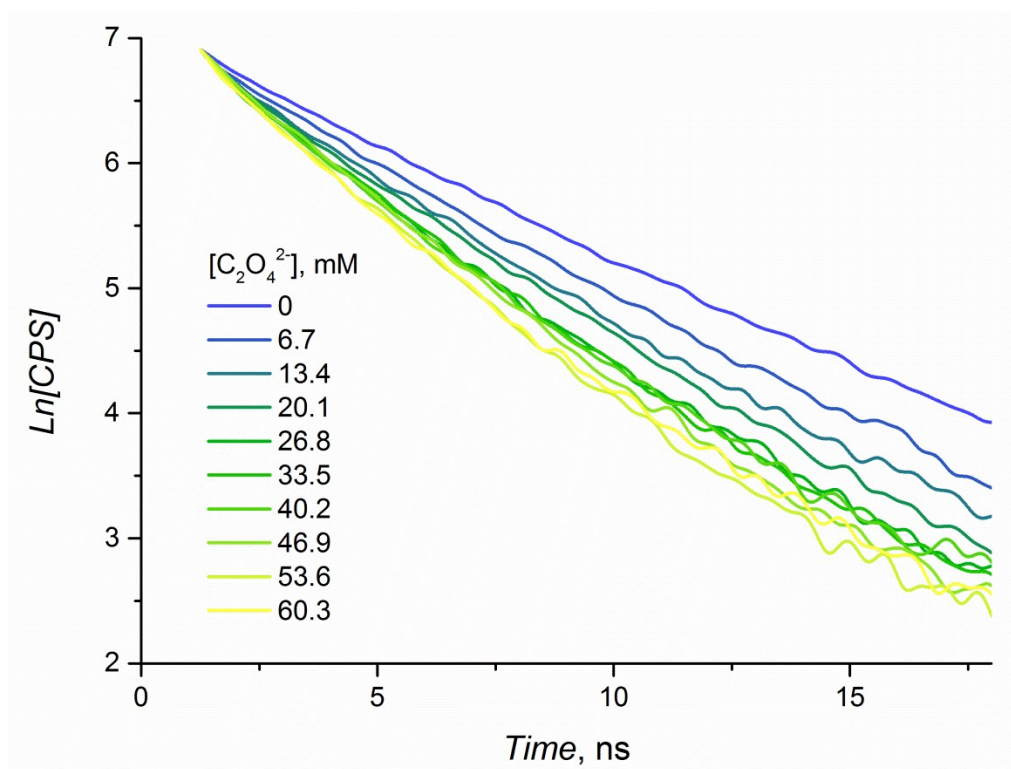

**Figure SI18.** Dependence of fluorescence kinetics of compound **IIa** on the concentration of oxygen.

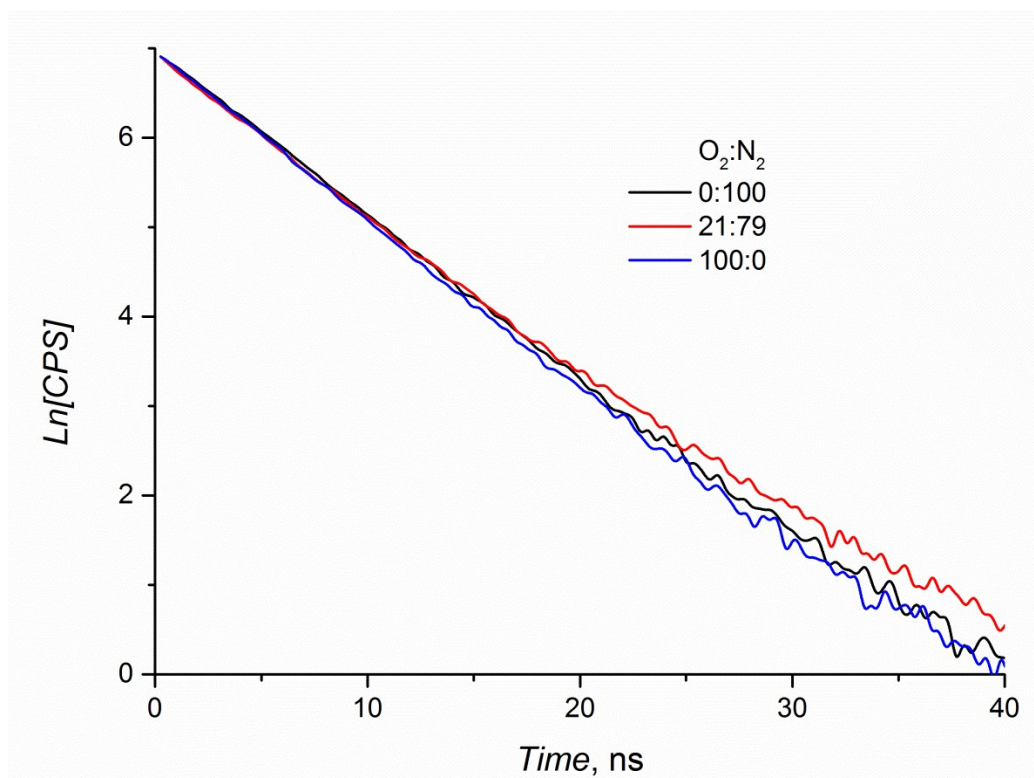



**Figure S119.** 3D plot of excitation/emission spectra of *N*-methylisoquinolinium tetrafluoroborate (*c* 0.01 mM) in water.

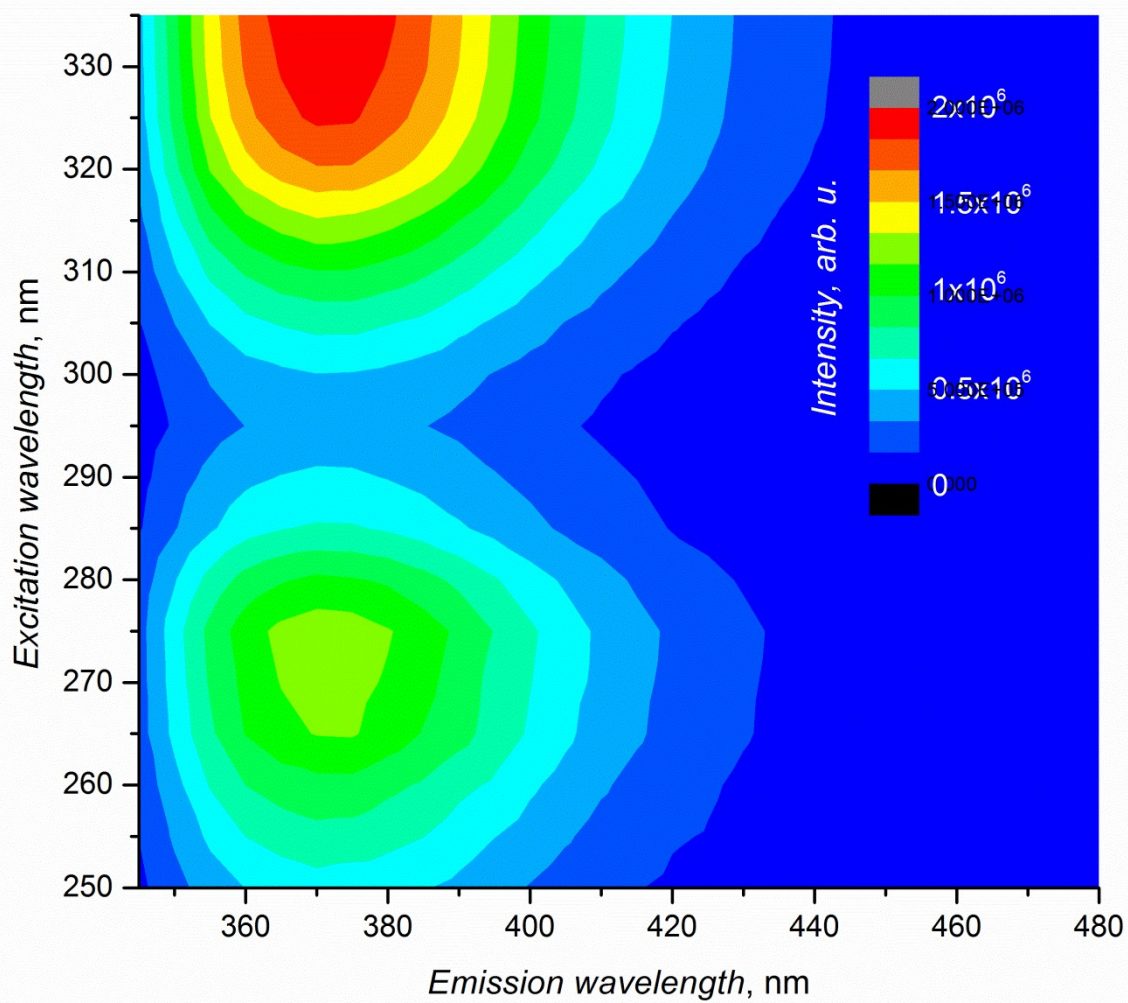

## Computational Details

All calculations were performed by using the Gaussian 16 suite of quantum chemical programs<sup>i</sup> at Resource center "Computer center of Saint Petersburg State University". Geometry optimizations of molecules were performed with the B3LYP density functional method<sup>ii</sup> and 6-31+G(d,p) basis set with PCM solvation model for water. Stationary points on the respective potential-energy surfaces were characterized at the same level of theory by evaluating the corresponding Hessian indices.

**Table S11.** Absolute Energies (au) and Cartesian Coordinates of the stationary point for **IIa**.

|                                                                                   |                                                                                                                                                                                                      |
|-----------------------------------------------------------------------------------|------------------------------------------------------------------------------------------------------------------------------------------------------------------------------------------------------|
| 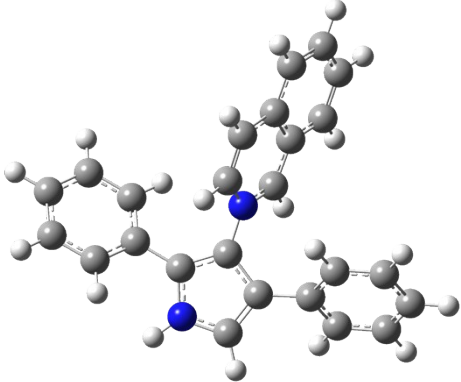 | <p><b>E</b> = -1073.536870, <b>H (0K)</b> = -1073.163207,<br/> <b>H (298K)</b> = -1073.141757,<br/> <b>G (298K)</b> = -1073.214487au.<br/>                     Number of imaginary frequency = 0</p> |
|-----------------------------------------------------------------------------------|------------------------------------------------------------------------------------------------------------------------------------------------------------------------------------------------------|

|   |            |            |            |   |            |            |            |
|---|------------|------------|------------|---|------------|------------|------------|
| C | 2.6316420  | 4.0257350  | -1.2111210 | C | -3.1874310 | 0.5156370  | -0.8251850 |
| C | 2.1888090  | 2.7385590  | -1.4162940 | C | -5.4302070 | -0.5417620 | 0.4638040  |
| C | 1.2827110  | 2.1535210  | -0.4883820 | H | -4.1523460 | -2.1721500 | 1.0388560  |
| C | 0.8340800  | 2.9027690  | 0.6491020  | C | -4.3976950 | 1.2111420  | -0.8425900 |
| C | 1.3099560  | 4.2237910  | 0.8295960  | H | -2.3319530 | 0.9202110  | -1.3560170 |
| C | 2.1899940  | 4.7683470  | -0.0845950 | C | -5.5233900 | 0.6852970  | -0.2007740 |
| H | 1.0811790  | 0.2402370  | -1.5175440 | H | -6.2974370 | -0.9559190 | 0.9691850  |
| H | 3.3230880  | 4.4803680  | -1.9125000 | H | -4.4629930 | 2.1584720  | -1.3692030 |
| H | 2.5209160  | 2.1628480  | -2.2740110 | H | -6.4647000 | 1.2260470  | -0.2193540 |
| C | 0.7994470  | 0.8477980  | -0.6665520 | C | 1.8440510  | -2.2758100 | 0.0636780  |
| C | -0.0702580 | 2.2691910  | 1.5437560  | C | 2.5917110  | -3.0875630 | -0.8097310 |
| H | 0.9760950  | 4.7971590  | 1.6882360  | C | 2.5289720  | -1.5581490 | 1.0618910  |
| H | 2.5523120  | 5.7816300  | 0.0563700  | C | 3.9793230  | -3.1836420 | -0.6842910 |
| C | -0.4883090 | 0.9892510  | 1.3189910  | H | 2.0818080  | -3.6354260 | -1.5967390 |
| H | -0.4293490 | 2.7918040  | 2.4230300  | C | 3.9181960  | -1.6467480 | 1.1792170  |
| H | -1.1542870 | 0.4490490  | 1.9764910  | H | 1.9739560  | -0.9465370 | 1.7668220  |
| C | -0.4783350 | -3.2854180 | -0.2483100 | C | 4.6491780  | -2.4602310 | 0.3079100  |
| C | 0.3733180  | -2.2090830 | -0.0618270 | H | 4.5374140  | -3.8163450 | -1.3683400 |
| C | -0.4866490 | -1.0643150 | 0.0095050  | H | 4.4269210  | -1.0870570 | 1.9586780  |
| C | -1.8141470 | -1.4627910 | -0.1307800 | H | 5.7287850  | -2.5300950 | 0.4013380  |
| H | -0.2563200 | -4.3380330 | -0.3348890 | N | -0.0524730 | 0.2910460  | 0.2065430  |
| C | -3.0810770 | -0.7155340 | -0.1523190 | N | -1.7680320 | -2.8268030 | -0.2744470 |
| C | -4.2190850 | -1.2350080 | 0.4938880  | H | -2.5783790 | -3.4058770 | -0.4465980 |

**Figure SI20.** Calculated UV-Vis spectrum of **IIa**.

Excitation energies and oscillator strengths for two lowest electronically excited singlet states (TD DFT, B3LYP/6-31+g(d,p), water /PCM)

Excited State 1: 2.5638 eV, 483.60 nm,  $f=0.0271$ , HOMO  $\rightarrow$  LUMO 99.6%

Excited State 2: 3.2606 eV, 380.25 nm,  $f=0.0535$ , HOMO-1  $\rightarrow$  LUMO 97.4%

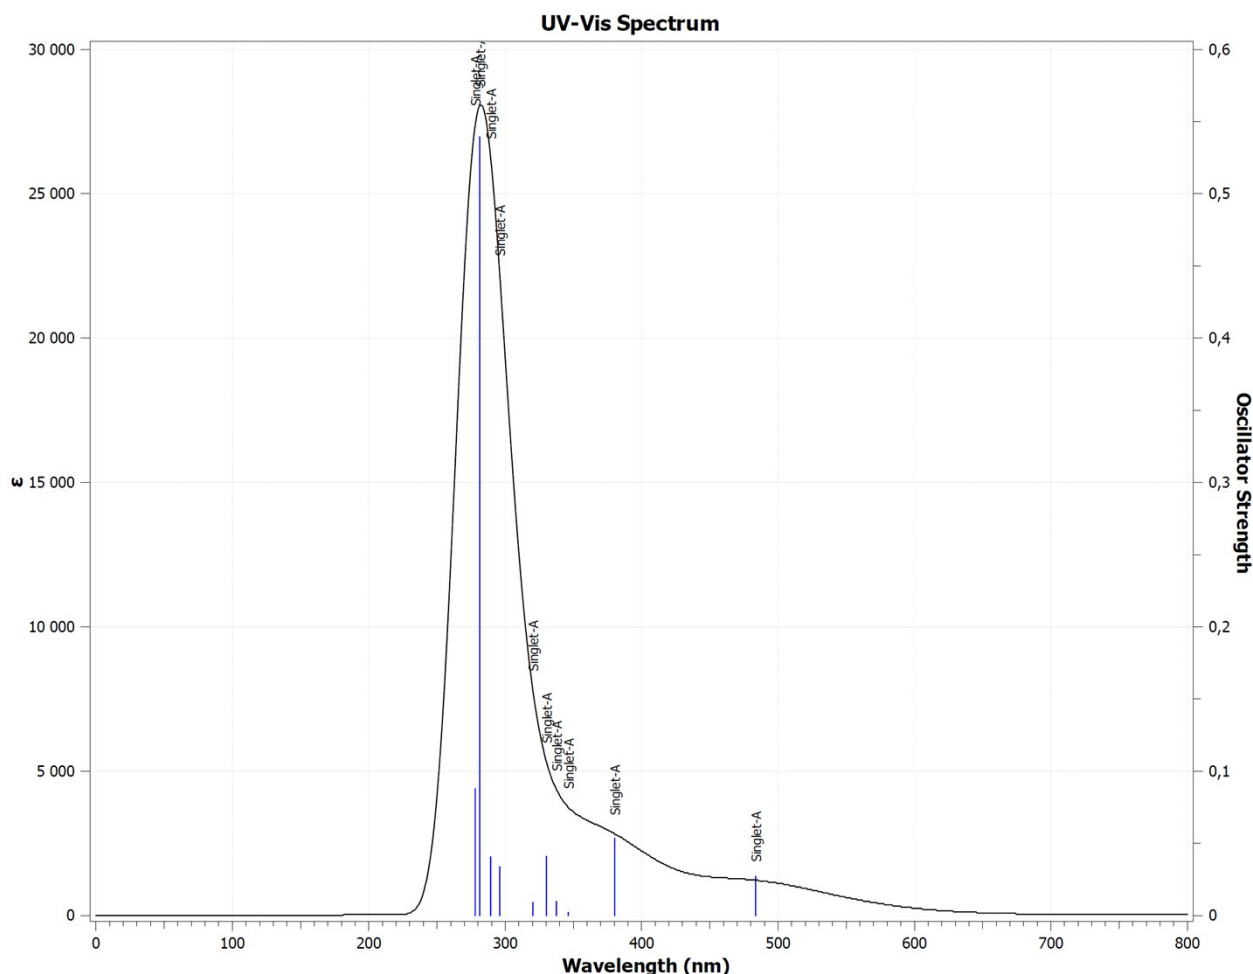

<sup>1</sup> Gaussian 16, Revision A.03, Frisch, M. J.; Trucks, G. W.; Schlegel, H. B.; Scuseria, G. E.; Robb, M. A.; Cheeseman, J. R.; Scalmani, G.; Barone, V.; Petersson, G. A.; Nakatsuji, H.; Li, X.; Caricato, M.; Marenich, A. V.; Bloino, J.; Janesko, B. G.; Gomperts, R.; Mennucci, B.; Hratchian, H. P.; Ortiz, J. V.; Izmaylov, A. F.; Sonnenberg, J. L.; Williams-Young, D.; Ding, F.; Lipparini, F.; Egidi, F.; Goings, J.; Peng, B.; Petrone, A.; Henderson, T.; Ranasinghe, D.; Zakrzewski, V. G.; Gao, J.; Rega, N.; Zheng, G.; Liang, W.; Hada, M.; Ehara, M.; Toyota, K.; Fukuda, R.; Hasegawa, J.; Ishida, M.; Nakajima, T.; Honda, Y.; Kitao, O.; Nakai, H.; Vreven, T.; Throssell, K.; Montgomery, J. A., Jr.; Peralta, J. E.; Ogliaro, F.; Bearpark, M. J.; Heyd, J. J.; Brothers, E. N.; Kudin, K. N.; Staroverov, V. N.; Keith, T. A.; Kobayashi, R.; Normand, J.; Raghavachari, K.; Rendell, A. P.; Burant, J. C.; Iyengar, S. S.; Tomasi, J.; Cossi, M.; Millam, J. M.; Klene, M.; Adamo, C.; Cammi, R.; Ochterski, J. W.; Martin, R. L.; Morokuma, K.; Farkas, O.; Foresman, J. B.; Fox, D. J. Gaussian, Inc., Wallingford CT, **2016**.

<sup>2</sup> (a) Becke, A. D. *J. Chem. Phys.* **1993**, *98*, 5648–5652. (b) Becke, A. D. *Phys. Rev. A* **1988**, *38*, 3098–3100. (c) Lee, C.; Yang, W.; Parr, R. G. *Phys. Rev. B* **1988**, *37*, 785–789.
